# Supplementary material
Source: MDPI journal article supplement (https://www.mdpi.com/2313-0105/10/3/100)
Supplement: s1 [file s1]

## Supporting Information

### **Rate capability performance of high areal capacity water-based NMC811 electrodes: the role of binders and current collectors**

Yuri Surace<sup>a\*</sup>, Marcus Jahn<sup>a</sup>, Damian Cupid<sup>a</sup>

*<sup>a</sup>Battery Technologies, Center for Transport Technologies, AIT Austrian Institute of  
Technology GmbH, Giefinggasse 4, 1210 Vienna, Austria*

\* To whom correspondence should be addressed  
(e-mail: [yuri.surace@ait.ac.at](mailto:yuri.surace@ait.ac.at) Tel +43 50550-6243 ).

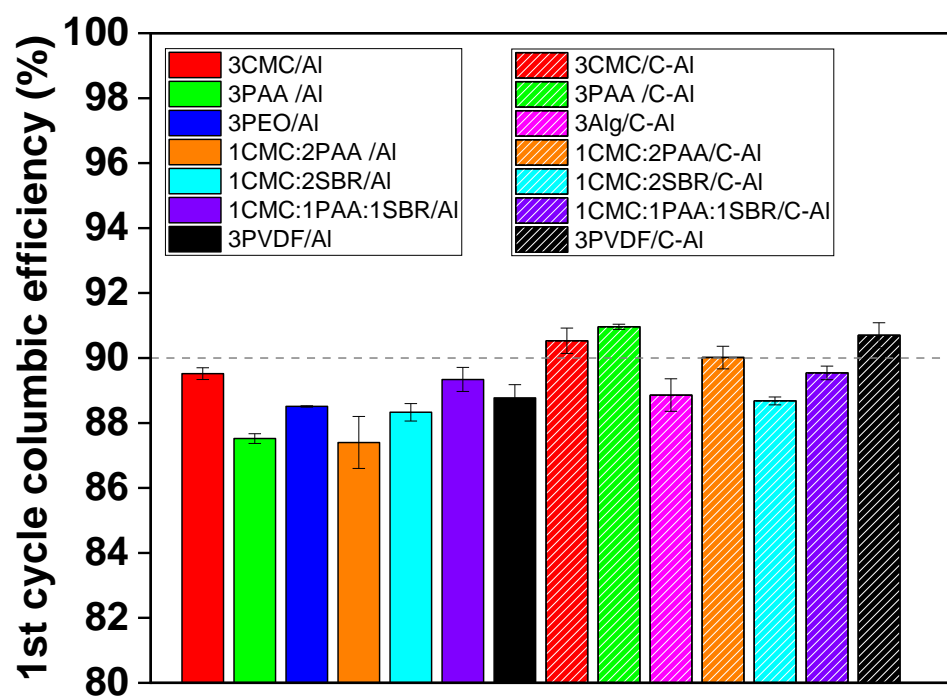

Fig.S1: 1<sup>st</sup> cycle columbic efficiency of the investigated electrode.

Table S1: 1<sup>st</sup> cycle columbic efficiency of the investigated electrodes

| Electrode         | 1 <sup>st</sup> cycle columbic efficiency (%) | St.Dev. | Electrode           | 1 <sup>st</sup> cycle columbic efficiency (%) | St.Dev. |
|-------------------|-----------------------------------------------|---------|---------------------|-----------------------------------------------|---------|
| 3CMC/Al           | 89.5                                          | 0.2     | 3CMC/C-Al           | 90.5                                          | 0.4     |
| 3PAA/Al           | 87.5                                          | 0.2     | 3PAA/C-Al           | 91.0                                          | 0.1     |
| 3PEO/Al           | 88.5                                          | 0.1     | 3Alg/C-Al           | 88.9                                          | 0.5     |
| 1CMC:2PAA/Al      | 87.4                                          | 0.4     | 1CMC:2PAA/C-Al      | 90.0                                          | 0.3     |
| 1CMC:2SBR/Al      | 88.3                                          | 0.3     | 1CMC:2SBR/C-Al      | 88.7                                          | 0.1     |
| 1CMC:1PAA:1SBR/Al | 89.3                                          | 0.4     | 1CMC:1PAA:1SBR/C-Al | 89.5                                          | 0.2     |
| 3PVDF/Al          | 88.8                                          | 0.4     | 3PVDF/C-Al          | 90.7                                          | 0.4     |

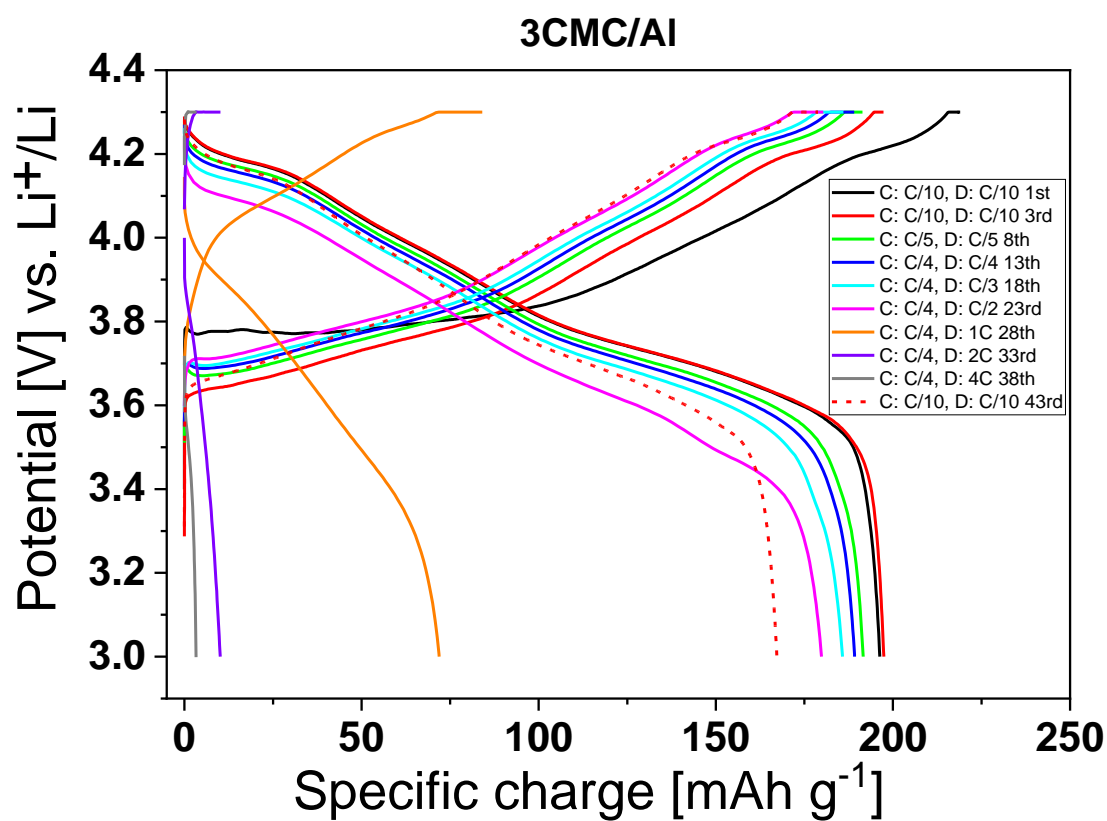

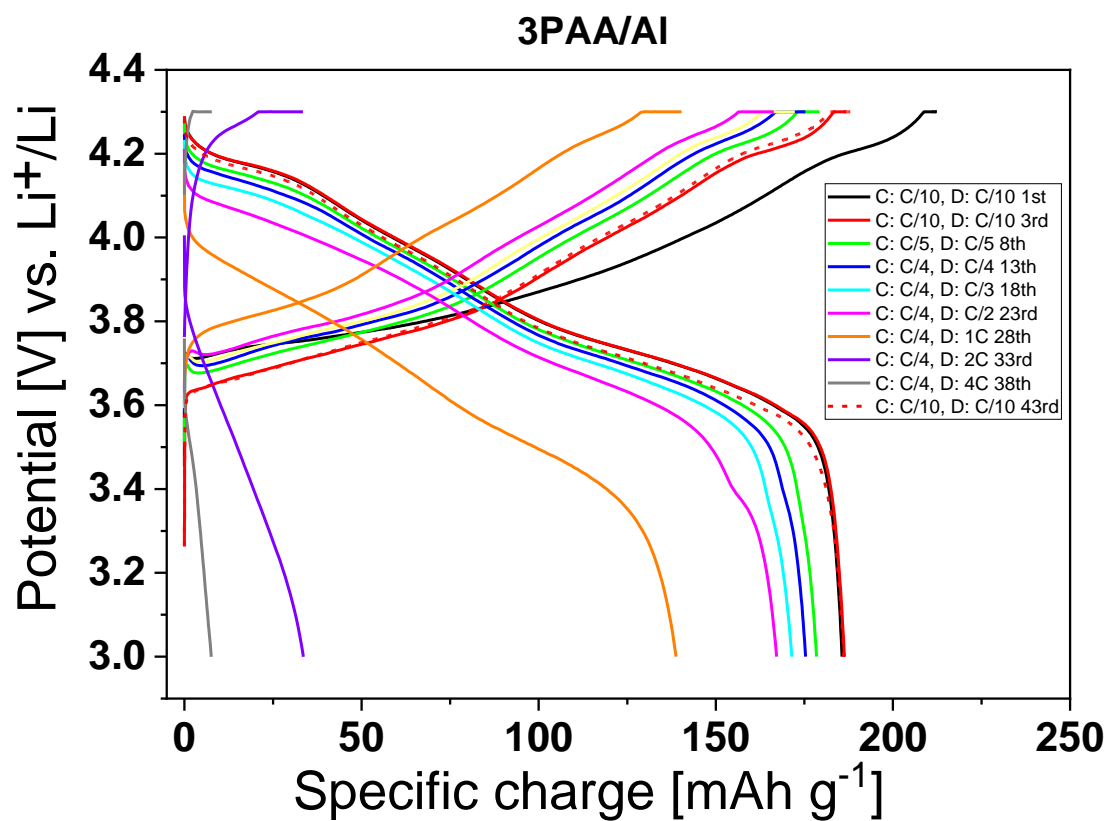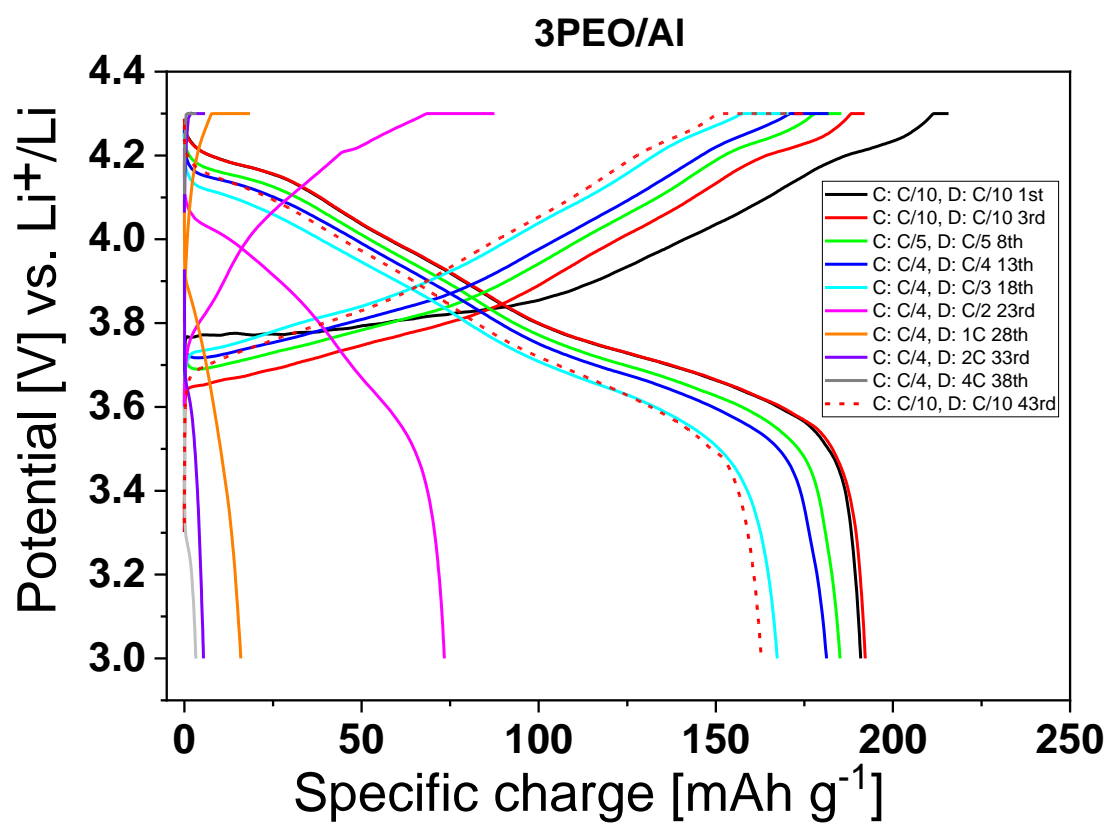

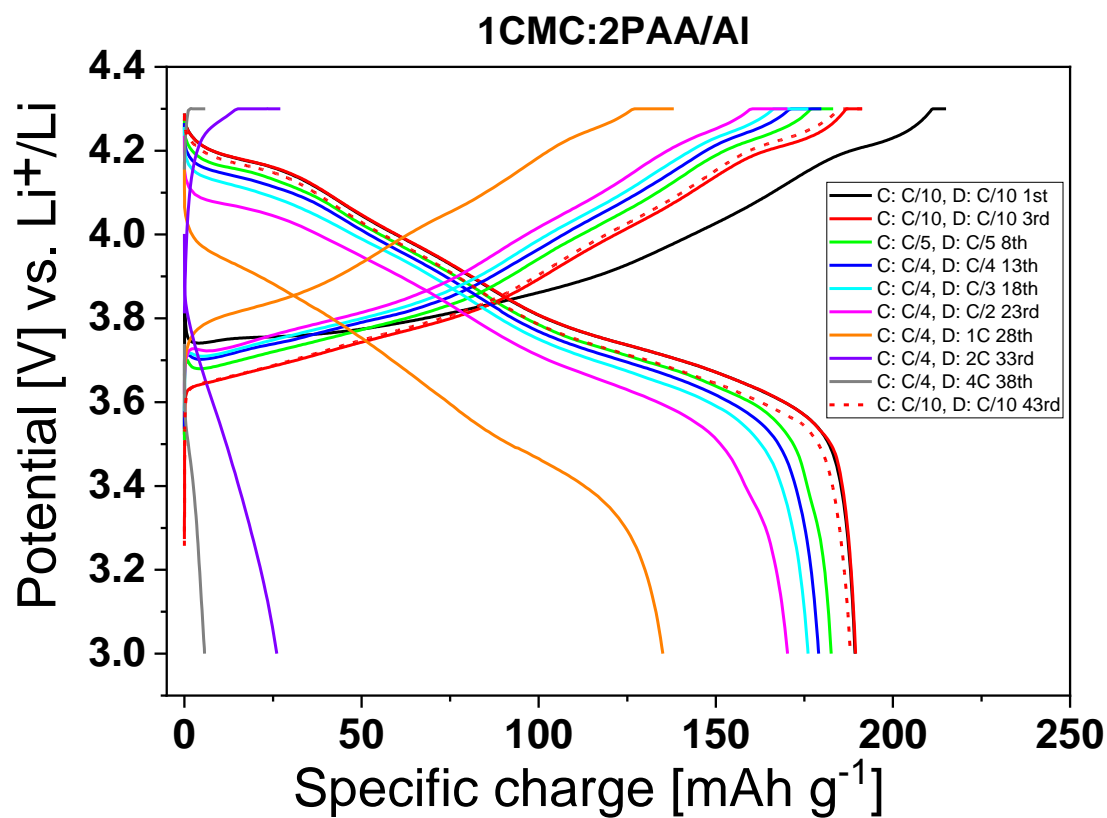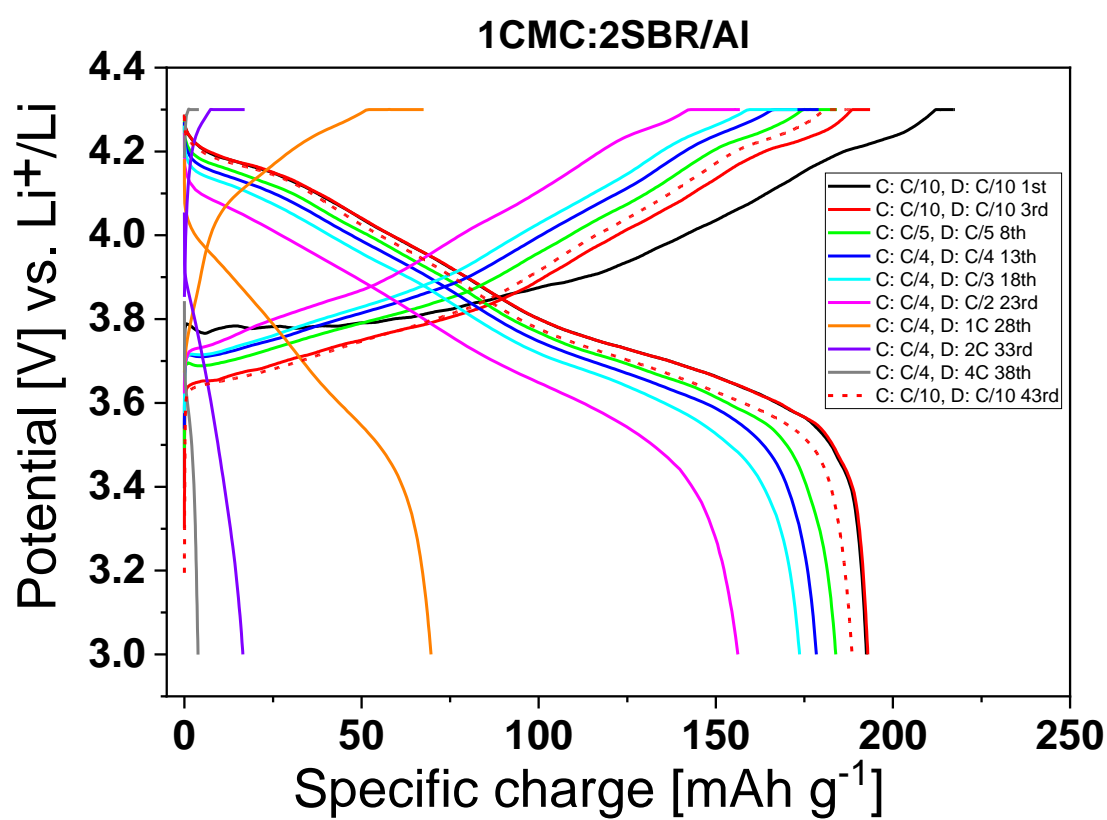

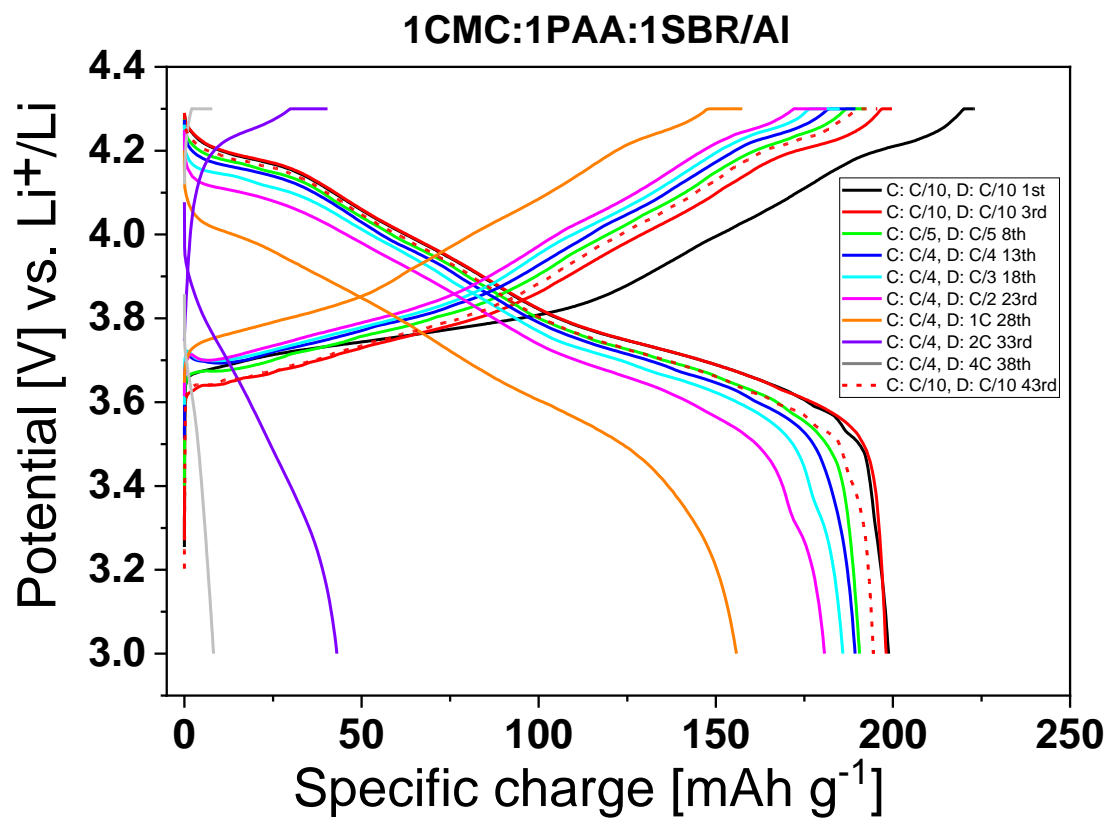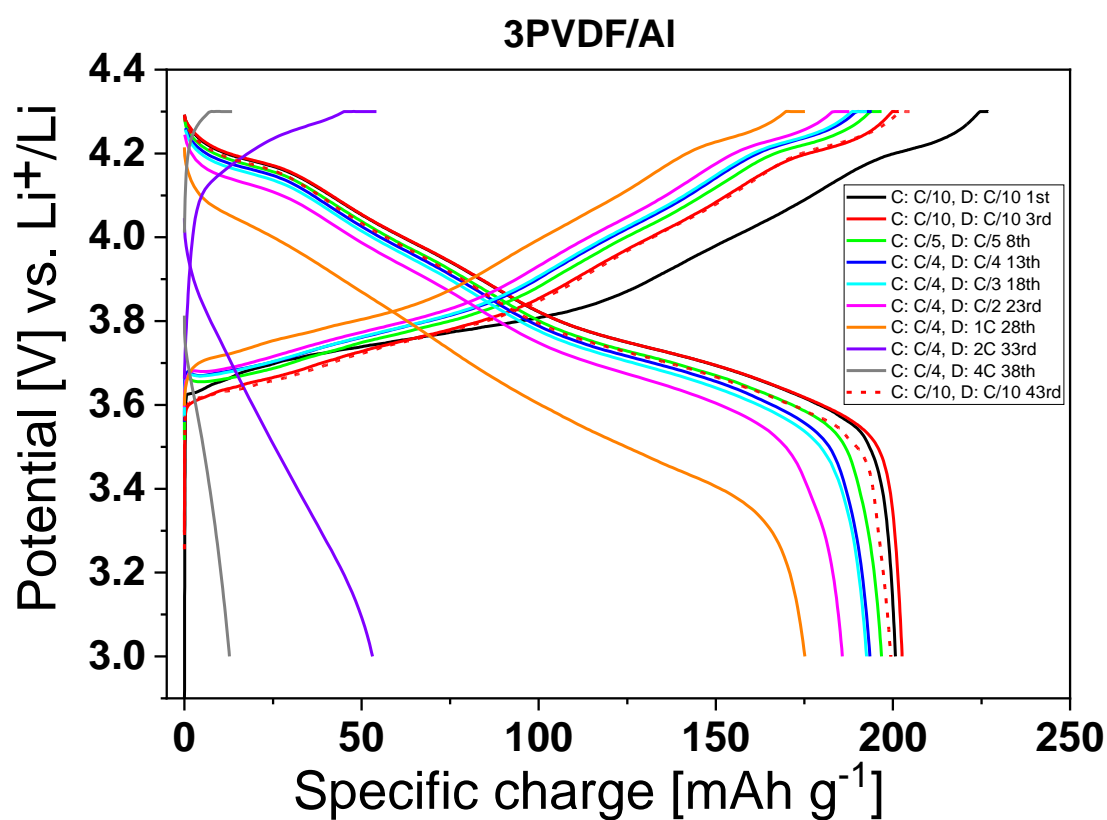

Fig.S2: Potential profile of 3CMC/Al, 3PAA/Al, 3PEO/Al, 1CMC:2PAA/Al, 1CMC:2SBR/Al, CMC:1PAA:1SBR/Al and 3PVDF/Al electrodes.

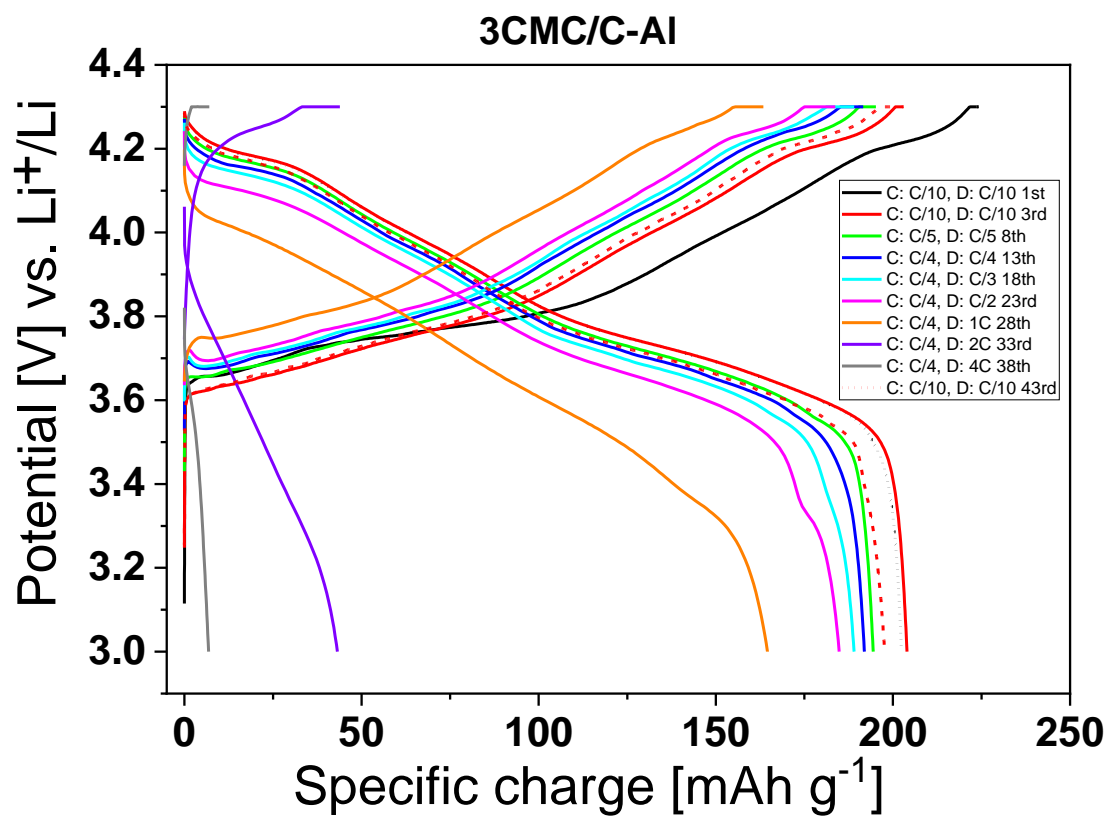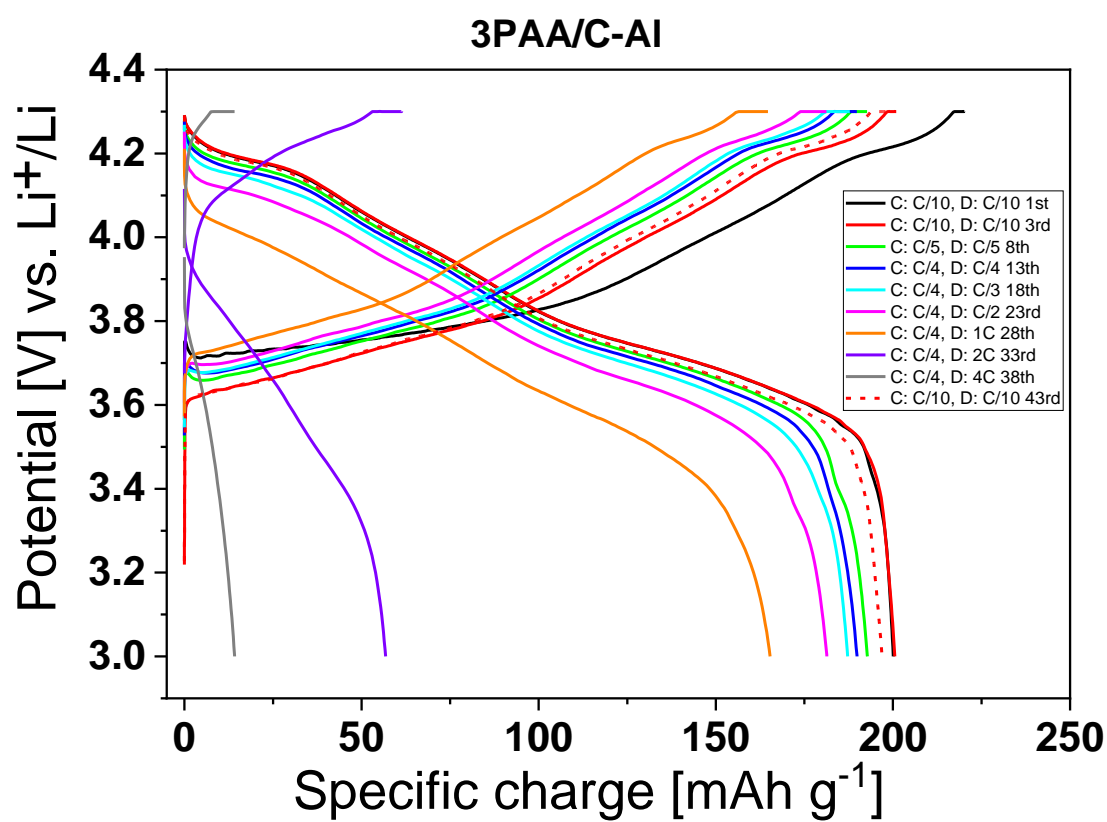

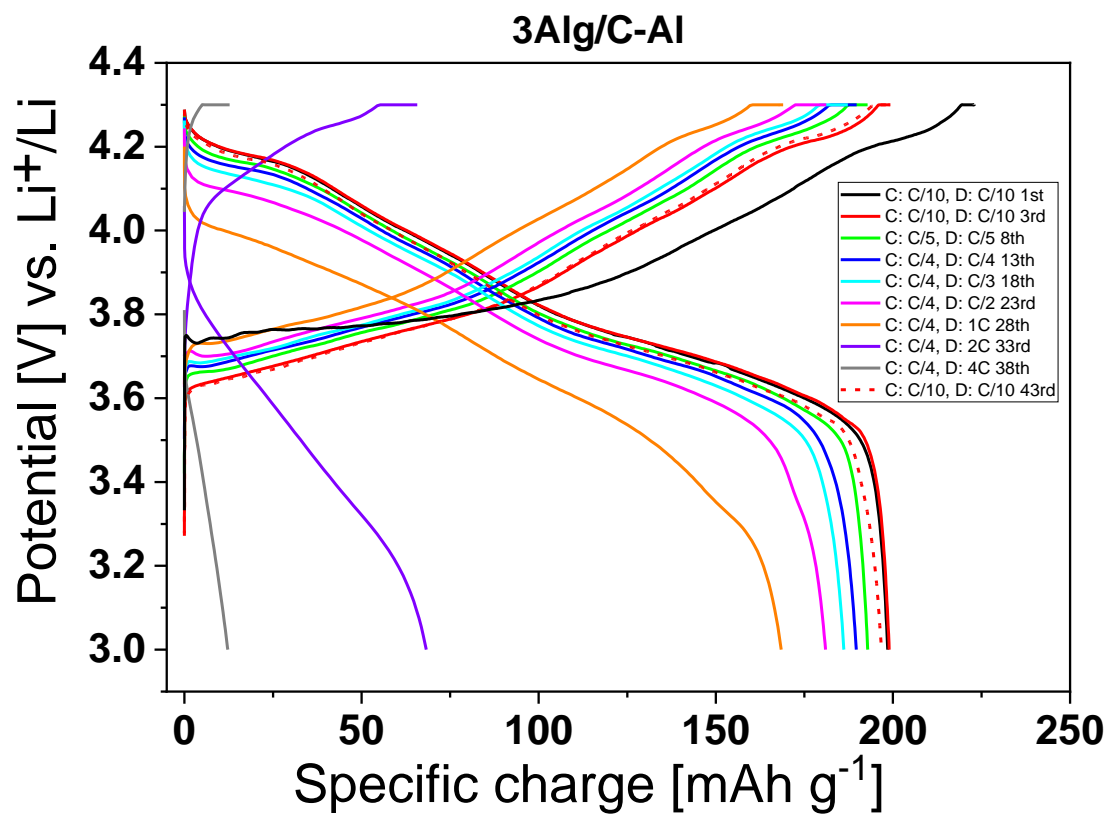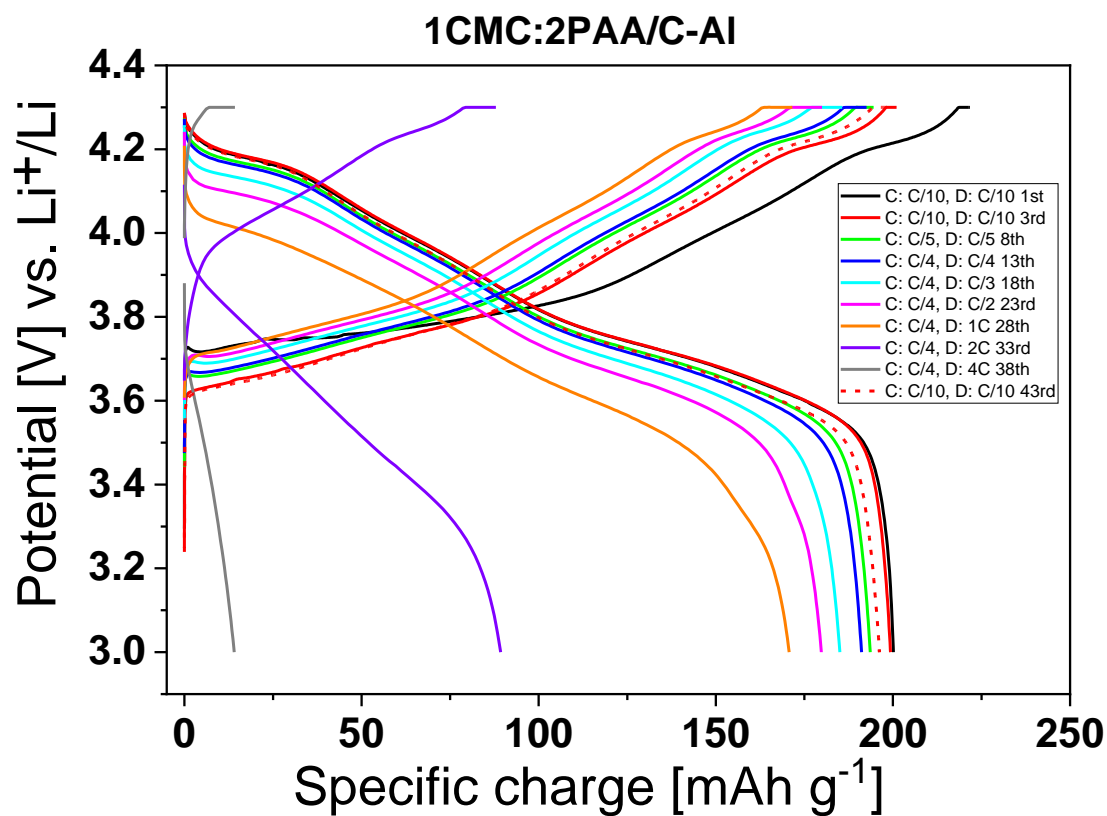



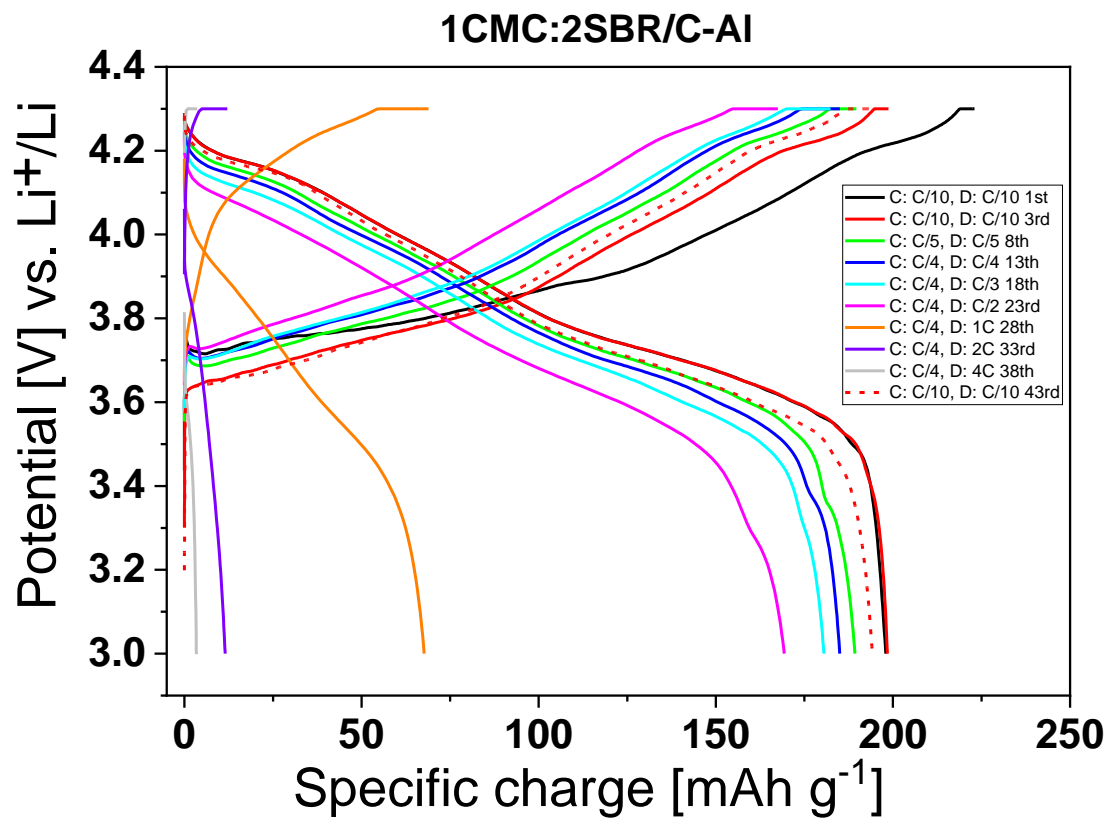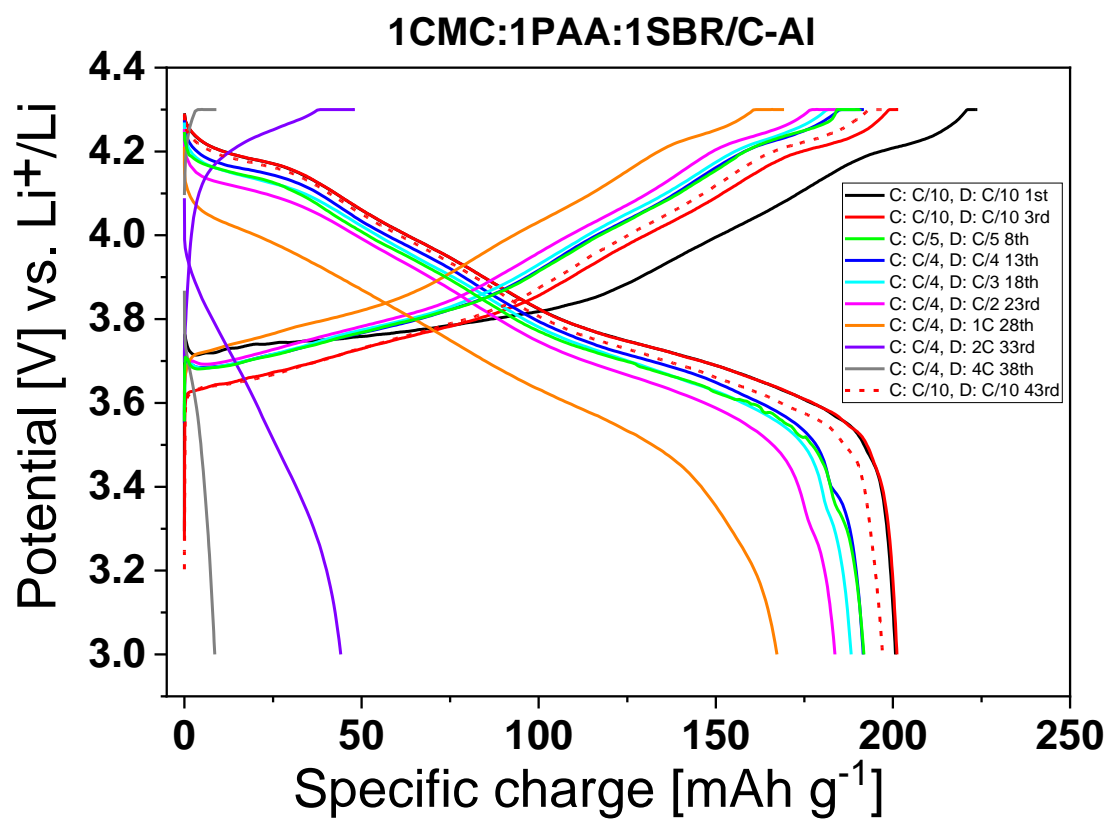

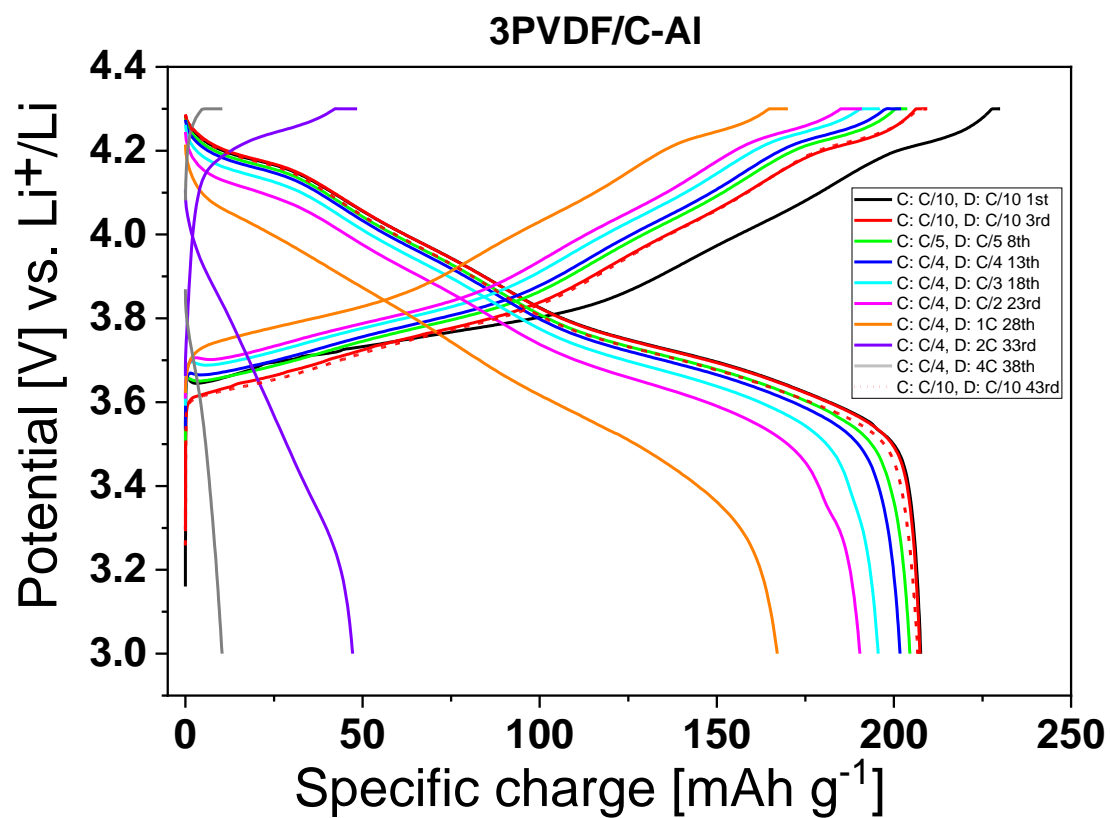

Fig.S3: Potential profile of 3CMC/C-Al, 3PAA/C-Al, 3Alg/C-Al, 1CMC:2PAA/C-Al, 1CMC:2SBR/C-Al, 1CMC:1PAA:1SBR/C-Al, and 3PVDF/C-Al

Table S2: Absolute capacity and relative capacity of the investigated electrodes.

|                    | Cycle nr.                            | 3     | 8     | 13    | 18    | 23    | 28    | 33   | 38   | 43    |
|--------------------|--------------------------------------|-------|-------|-------|-------|-------|-------|------|------|-------|
|                    | Rate                                 | C/10  | C/5   | C/4   | C/3   | C/2   | 1C    | 2C   | 4C   | C/10  |
| 3CMC/Al            | Abs.capacity (mAh g <sup>-1</sup> )* | 196.6 | 190.1 | 187.1 | 183.1 | 176.8 | 69.8  | 10.0 | 3.1  | 170.3 |
|                    | Rel.capacity (%)                     | 100.0 | 96.7  | 95.2  | 93.1  | 89.9  | 35.5  | 5.1  | 1.6  | 86.6  |
| 3PAA/Al            | Abs.capacity (mAh g <sup>-1</sup> )  | 187.0 | 179.0 | 175.9 | 172.2 | 167.2 | 132.0 | 29.5 | 7.2  | 186.6 |
|                    | Rel.capacity (%)                     | 100.0 | 95.7  | 94.1  | 92.1  | 89.5  | 70.6  | 15.8 | 3.8  | 99.8  |
| 3PEO/Al            | Abs.capacity (mAh g <sup>-1</sup> )  | 192.4 | 185.2 | 181.3 | 167.8 | 77.5  | 16.4  | 5.5  | 3.2  | 166.7 |
|                    | Rel.capacity (%)                     | 100.0 | 96.3  | 94.2  | 87.2  | 40.3  | 8.5   | 2.8  | 1.7  | 86.7  |
| 1CMC:2PAA/Al       | Abs.capacity (mAh g <sup>-1</sup> )  | 188.3 | 180.8 | 177.6 | 174.5 | 169.3 | 140.0 | 31.1 | 6.3  | 187.5 |
|                    | Rel.capacity (%)                     | 100.0 | 96.0  | 94.3  | 92.7  | 89.9  | 74.4  | 16.5 | 3.3  | 99.5  |
| 1CMC:2SBR/Al       | Abs.capacity (mAh g <sup>-1</sup> )  | 193.8 | 184.6 | 180.0 | 175.0 | 158.0 | 68.5  | 15.9 | 3.8  | 188.9 |
|                    | Rel.capacity (%)                     | 100.0 | 95.3  | 92.9  | 90.3  | 81.5  | 35.3  | 8.2  | 1.9  | 97.5  |
| 1CMC:1SBR1PAA/Al   | Abs.capacity (mAh g <sup>-1</sup> )  | 199.3 | 191.7 | 188.5 | 186.1 | 180.0 | 152.3 | 37.5 | 7.2  | 194.7 |
|                    | Rel.capacity (%)                     | 100.0 | 96.2  | 94.6  | 93.4  | 90.3  | 76.4  | 18.8 | 3.6  | 97.7  |
| 3PVDF/Al           | Abs.capacity (mAh g <sup>-1</sup> )  | 202.0 | 195.9 | 192.0 | 189.9 | 183.2 | 171.6 | 52.8 | 13.0 | 198.9 |
|                    | Rel.capacity (%)                     | 100.0 | 97.0  | 95.0  | 94.0  | 90.7  | 84.9  | 26.1 | 6.4  | 98.4  |
|                    |                                      |       |       |       |       |       |       |      |      |       |
| 3CMC/C-Al          | Abs.capacity (mAh g <sup>-1</sup> )  | 201.9 | 195.4 | 191.7 | 188.6 | 183.7 | 159.6 | 37.8 | 6.5  | 198.2 |
|                    | Rel.capacity (%)                     | 100.0 | 96.8  | 95.0  | 93.4  | 91.0  | 79.0  | 18.7 | 3.2  | 98.1  |
| 3PAA/C-Al          | Abs.capacity (mAh g <sup>-1</sup> )  | 201.1 | 192.9 | 190.1 | 187.6 | 181.5 | 164.5 | 53.2 | 12.5 | 196.8 |
|                    | Rel.capacity (%)                     | 100.0 | 95.9  | 94.6  | 93.3  | 90.2  | 81.8  | 26.4 | 6.2  | 97.9  |
| 3Al/C-Al           | Abs.capacity (mAh g <sup>-1</sup> )  | 199.3 | 192.8 | 190.0 | 186.6 | 181.6 | 168.8 | 70.2 | 13.8 | 197.1 |
|                    | Rel.capacity (%)                     | 100.0 | 96.7  | 95.3  | 93.6  | 91.1  | 84.7  | 35.2 | 6.9  | 98.9  |
| 1CMC:2PAA/C-Al     | Abs.capacity (mAh g <sup>-1</sup> )  | 199.3 | 192.8 | 190.4 | 185.7 | 181.2 | 171.9 | 88.5 | 14.4 | 196.5 |
|                    | Rel.capacity (%)                     | 100.0 | 96.8  | 95.5  | 93.2  | 90.9  | 86.2  | 44.4 | 7.2  | 98.6  |
| 1CMC:2SBR/C-Al     | Abs.capacity (mAh g <sup>-1</sup> )  | 197.2 | 189.5 | 184.8 | 182.3 | 169.7 | 73.7  | 12.3 | 3.6  | 192.8 |
|                    | Rel.capacity (%)                     | 100.0 | 96.1  | 93.7  | 92.5  | 86.1  | 37.4  | 6.3  | 1.8  | 97.8  |
| 1CMC:1SBR1PAA/C-Al | Abs.capacity (mAh g <sup>-1</sup> )  | 200.0 | 193.8 | 190.9 | 186.6 | 183.2 | 162.9 | 44.0 | 8.1  | 196.4 |
|                    | Rel.capacity (%)                     | 100.0 | 96.9  | 95.5  | 93.3  | 91.6  | 81.5  | 22.0 | 4.0  | 98.2  |
| 3PVDF/C-Al         | Abs.capacity (mAh g <sup>-1</sup> )  | 208.5 | 205.4 | 203.0 | 198.4 | 193.1 | 175.9 | 52.4 | 13.4 | 208.4 |
|                    | Rel.capacity (%)                     | 100.0 | 98.5  | 97.4  | 95.2  | 92.6  | 84.3  | 25.1 | 6.4  | 100.0 |

\*the average value of the 3rd cycle of each rate is considered
